# Supplementary material
Source: Royal Society of Chemistry journal article supplement (doi:10.1039/d6nj00764c)
Supplement: d6nj00764c1.pdf [file d6nj00764c1.pdf]

## **Schottky Heterojunction-Mediated Charge Separation in ZnIn<sub>2</sub>S<sub>4</sub>/Cu for Boosted Photocatalytic CO<sub>2</sub> Reduction**

Honghong Xiong,<sup>a</sup> Haozhe Shen,<sup>b</sup> Yuan Cao,<sup>b</sup> Xu Zhang,<sup>b</sup> Xiang Su,<sup>b</sup> Ming La<sup>b\*</sup>

<sup>a</sup> College of Mechanical and Electrical Engineering, Zhengzhou Shengda University, Zhengzhou, 451191, China.

<sup>b</sup> College of Chemistry and Chemical Engineering, Pingdingshan University, Pingdingshan, 467000, China

\* Corresponding author. Tel.: E-mail: 2749@pdsu.edu.cn

## 1 Experimental Section

Sodium sulphate ( $\text{Na}_2\text{SO}_4$ ), Zinc sulfate heptahydrate ( $\text{ZnSO}_4 \cdot 7\text{H}_2\text{O}$ ), Thioacetamide ( $\text{C}_2\text{H}_5\text{NS}$ ), and Copper(II) nitrate trihydrate ( $\text{Cu}(\text{NO}_3)_2 \cdot 3\text{H}_2\text{O}$ ), and triethanolamine (TEOA) were purchased from Sinopharm Chemical Reagent Co. Ltd. (Shanghai, China). Indium (III) chloride ( $\text{InCl}_3 \cdot 4\text{H}_2\text{O}$ ) was purchased from Aladdin Biochemical Technology Co., Ltd. (Shanghai, China). All chemicals were commercially available and used without further purification.

## 2 Characterization method

XRD patterns were recorded using a D8 ADVANCE X-ray diffractometer equipped with a Cu  $K\alpha$  radiation source ( $\lambda = 1.5406 \text{ \AA}$ ), and all measurements were performed at room temperature. UV-vis DRS characterization was conducted on a Shimadzu UV-2600 spectrophotometer using barium sulfate ( $\text{BaSO}_4$ ) as the reference substrate. XPS analysis was carried out using a Thermo Scientific ESCALAB 250XI X-ray photoelectron spectrometer, with the binding energies calibrated to the C 1s peak at 284.8 eV. transmission electron microscopy (TEM) and high-resolution TEM (HRTEM) characterization was performed using a JEOL-2010 transmission electron microscope. Surface photovoltage (SPV) responses were measured using an ESCALAB 250X photoelectron spectrometer. The Cu concentration of photocatalyst was quantified by the inductively coupled plasma optical emission spectrometry (ICP-OES, 720, Agilent). Surface photovoltage (SPV) was measured by ESCALAB 250X photoelectron spectrometer. The optical band gap of the material was calculated using the Kubelka-Munk formula, as expressed in Equation (1):

$$\alpha h\nu = A (h\nu - E_g)^{1/n} \quad (1)$$

where  $\alpha$  is the absorption coefficient,  $h$  represents Planck's constant,  $\nu$  is the frequency of light,  $E_g$  denotes the band gap energy of the semiconductor, and  $A$  is a constant. The value of  $n$  depends on the

type of semiconductor:  $n$  is taken as  $1/2$  for a direct band gap semiconductor, while  $n$  is  $2$  for an indirect band gap semiconductor.

### 3 Photo-electrochemical measurements

Electrochemical performance measurements were conducted using a Shanghai Chenhua CHI660E electrochemical workstation with a standard three-electrode system. The working electrode was fluorine-doped tin oxide (FTO) conductive glass loaded with the catalyst, an Ag/AgCl electrode served as the reference electrode, a platinum foil was used as the counter electrode, and  $0.5 \text{ mol}\cdot\text{L}^{-1}$  high-purity sodium sulfate solution was employed as the electrolyte. The working electrode was prepared as follows: 5 mg of catalyst was mixed with 250  $\mu\text{L}$  of anhydrous ethanol, 250  $\mu\text{L}$  of ethylene glycol, and 40  $\mu\text{L}$  of 5% Nafion solution, followed by ultrasonic dispersion for 30 minutes. The loading amount was controlled at  $80 \mu\text{L}\cdot\text{cm}^{-2}$ ; the mixed slurry was uniformly coated onto the FTO surface to form a thin film, which was subsequently dried at  $60 \text{ }^\circ\text{C}$  for 3 h. Transient photocurrent response tests were performed at a bias voltage of 0.6 V, and the  $i$ - $t$  curves were recorded under alternating light/dark cycles. Electrochemical impedance spectroscopy (EIS) measurements were carried out at open circuit potential with a scanning frequency range set from 0.01 to  $10^5$  Hz. In the three-electrode system, the prepared sample-coated FTO served as the working electrode, a Pt electrode was used as the counter electrode, and an Ag/AgCl electrode was employed as the reference electrode.

### 4 Density functional theory calculations

All the density functional theory (DFT) calculations were performed by CASTEP module available in Materials Studio 7.0.<sup>S1</sup> The generalized-gradient approximation of Perdew-Burke-Ernzerhof (GGA-PBE) formula is used for the electronic exchange-correlation interaction. The electron wave function was expanded in plane waves with a cutoff energy of 500 eV.<sup>S2</sup> For the  $\text{ZnIn}_2\text{S}_4$  and  $\text{ZnIn}_2\text{S}_4/\text{Cu}$

supercells, the Monkhorst-Pack grid scheme k-point grid sampling were set to be  $3 \times 3 \times 1$  during the structural optimization and  $5 \times 5 \times 1$  for the electronic property calculation respectively. The total energy is converged to  $1.0 \times 10^{-5}$  eV/atom, and all the geometries are fully relaxed until the quantum mechanical forces acting on the atoms become less than  $0.03$  eV/Å.<sup>S3</sup> Here a thickness of  $20$  Å vacuum was selected in the z direction to avoid periodic interactions.

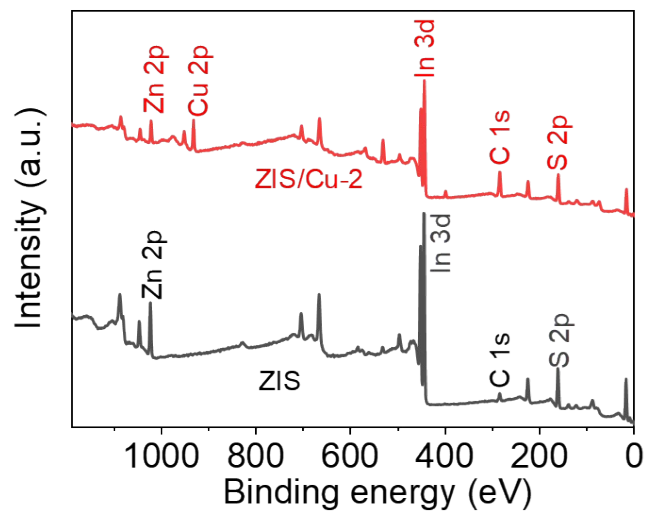

**Figure S1.** The survey XPS spectra of ZIS and ZIS/Cu-2.

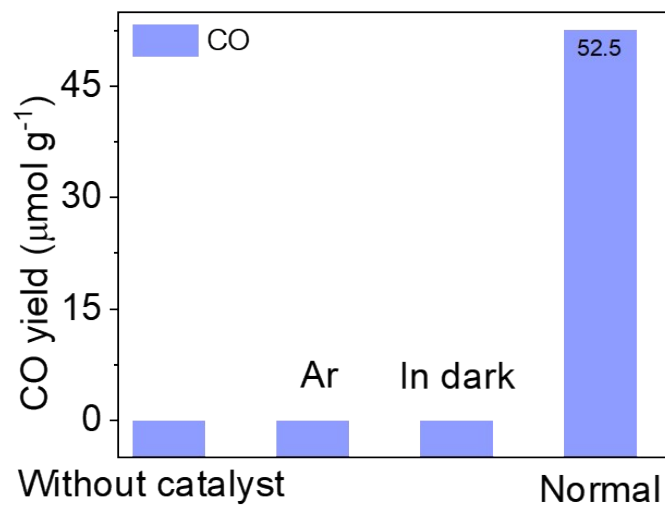

**Figure S2.** Evolution of CO under various reaction conditions.

**Table S1.** A brief list comparing the CO<sub>2</sub> photoreduction activity of ZIS/Cu with other reported photocatalysts.

| Photocatalyst                                         | Light source                          | Photocatalyst mass | Yield<br>( $\mu\text{mol}\cdot\text{g}^{-1}\cdot\text{h}^{-1}$ ) | Ref.      |
|-------------------------------------------------------|---------------------------------------|--------------------|------------------------------------------------------------------|-----------|
| ZnIn <sub>2</sub> S <sub>4</sub> /Cu                  | 300 W Xe lamp                         | 10 mg              | 17.5                                                             | This work |
| ZnIn <sub>2</sub> S <sub>4</sub> /BiVO <sub>4</sub>   | 300 W Xe lamp                         | 10 mg              | 4.75                                                             | S4        |
| Ag/CN/ZnIn <sub>2</sub> S <sub>4</sub>                | 300 W Xe lamp                         | 20 mg              | 5.63                                                             | S5        |
| Bi <sub>4</sub> O <sub>5</sub> I <sub>2</sub> @Cu-0.5 | 300 W Xe lamp                         | 50 mg              | 7.34                                                             | S6        |
| ZnIn <sub>2</sub> S <sub>4</sub> /MOF-808             | 300 W Xe lamp                         | 50 mg              | 8.2                                                              | S7        |
| Vs-AgInS <sub>2</sub>                                 | 300 W Xe lamp (UVCUT 400)             | 20 mg              | 8.04                                                             | S8        |
| TiO <sub>2</sub> /WO <sub>3</sub>                     | 300 W Xe lamp                         | 20 mg              | 4.73                                                             | S9        |
| NH <sub>2</sub> -UIO-66/COF                           | 300W Xe lamp<br>$\lambda \geq 400$ nm | 10 mg              | 6.56                                                             | S10       |
| g-C <sub>3</sub> N <sub>4</sub> /BiOCl                | 300 W Xe lamp                         | 20 mg              | 4.73                                                             | S11       |
| Au/Vs- ZnIn <sub>2</sub> S <sub>4</sub>               | 300 W Xe lamp                         | 50 mg              | 8.15                                                             | S12       |
| Co-MOF/Cu <sub>2</sub> O                              | 300W Xe lamp<br>$\lambda \geq 400$ nm | 15 mg              | 3.83                                                             | S13       |

## References

- S1 Fujishima A, Zhang X and Tryk D 2008 Surf. Sci. Rep., 63, 515.
- S2 Perdew J P, Burke K and Ernzerhof M 1996 Phys. Rev. Lett., 77, 3865.
- S3 Monkhorst H J and Pack J D 1976 Phys. Rei. B, 13, 5188.
- S4 Q. Han, L. Li, W. Gao, Y. Shen, L. Wang, Y. Zhang, X. Wang, Q. Shen, Y. Xiong, Y. Zhou, Z. Zou, *ACS Appl. Mater. Interfaces*, 2021, **13**, 15092-15100.

- S5 Y. Zhang, M. Gao, S. Chen, H. Wang, P. Huo, *Acta Phys. -Chim. Sin.*, 2023, **39**, 2211051.
- S6 Q. Huang, J. Lin, D. Yang, Y. Hu, G. Zhou, W. Li, J. Hu, Z. Yang, *ACS Sustainable Chem. Eng.*, 2023, **11**, 17168-17178.
- S7 M. Song, X. Song, X. Liu, W. Zhou, P. Huo, *Chinese J. Catal.*, 2023, **51**, 180-192.
- S8 K. Wang, H. Qin, J. Li, Q. Cheng, Y. Zhu, H. Hu, J. Peng, S. Chen, G. Wang, S. Chou, S. Dou, Y. Xiao, *Appl. Catal. B-Environ. Energy*, 2023, **332**, 122763.
- S9 H. Su, W. Wang, H. Jiang, L. Sun, T. Kong, Z. Lu, H. Tang, L. Wang, Q. Liu, *Inorg. Chem.*, 2022, **34**, 13608-13617.
- S10 Q. Niu, S. Dong, J. Tian, G. Huang, J. Bi, L. Wu, *ACS Appl. Mater. Interface*, 2022, **14**, 24299-24308.
- S11 Y. Chen, F. Wang, Y. Cao, Y. Zou, Z. Huang, L. Ye, Y. Zhou, *ACS Appl. Mater. Interface*, 2020, **3**, 4610-4618.
- S12 J. Lin, J. He, Q. Huang, Y. Zhang, W. Li, J. Hu, G. Zhou, Z. Yang, *Inorg. Chem.*, 2024, **63**, 13117-13126.
- S13 W. Dong, J. Jia, Y. Wang, J. An, O. Yang, X. Gao, Y. Liu, J. Zhao, D. Li, *Chem. Eng. J.*, 2022, **438**, 135622.
